# Supplementary material
Source: PubMed Central journal article supplement (PMC5138104)
Supplement: NIHMS831404-supplement-1.pdf [file NIHMS831404-supplement-1.pdf]

## Supplementary Online Content

Teno JM, Gozalo P, Khandewal N, et al. Association of increasing use of mechanical ventilation among nursing home residents with advanced dementia and intensive care unit beds. *JAMA Internal Medicine*. Published online October 10, 2016. doi:10.1001/jamainternmed.2016.5964

**eMethods.** Analysis of Variables and Inclusion and Exclusion Criteria

**eTable 1.** AOR for All Variables in the Final Model to Examine the Association Between ICU Beds and Mechanical Ventilation

**eTable 2.** Characterizations of Hospitals Included and Excluded in the Analyses

**eTable 3.** 2004-2005 Hospitals Included and Excluded

**eTable 4.** 2000-2001 Hospitals Included and Excluded

**eTable 5.** 2012-2013 Hospitals Included and Excluded

This supplementary material has been provided by the authors to give readers additional information about their work.

## eMethods. Analysis of Variables and Inclusion and Exclusion Criteria

In this supplement, we provide the adjusted odds ratio (AOR) for all variables in the final model to examine the association between ICU beds and mechanical ventilation (eTable 1).

### **Characterizations of Hospitals included and not included in the analyses (eTable 2)**

There are two main exclusions that impact hospital admissions and hospitals studied. First, we required there to be information on number of ICU beds from the AHA. Second, we required that each hospital had at least 5 admissions per year. In the years studied, there was total of 744, 347 hospital admissions. A total of 109,165 hospitalizations were excluded (14.7%). The majority of the hospitalizations that were excluded were excluded because of missing data on number of ICU beds and ICU step down beds (n= 97,274), being in a hospital that did not meet the threshold of 5 hospitalizations for eligible patients (n= 1956), and finally, 9,935 hospitalizations were excluded because that patient was admitted to a hospital that had less than 5 hospitalizations in that year.

The second concern is which hospitals were not included in the analyses. There are four reasons that hospitals were excluded: 1) the hospital did not meet the threshold of 5 admissions for eligible patients; 2) the hospital did not submit information on ICU beds; and 3) the hospital did not participate in AHA survey. We estimate the potential denominator using both Medicare Claims or AHA data. With the AHA data, we applied the following inclusion criteria: 1) medical/surgical hospital (ie, excluding hospitals that are pediatric, psychiatric, long term hospital); 2) hospital reported Medicare admissions; and 3) hospital did not close in that year. In 2005, we found that there was 4882 hospitals based on AHA or Medicare Claims. Of these hospitals, 97 did not match to AHA data, 568 hospitals were missing data on AHA data, and 662 hospitals did not meet the cut off of 5 hospital admissions. We focused on hospitals excluded on the basis of missing ICU bed data and too few admissions.

As expected, our inclusion criteria were more likely to exclude smaller hospitals, those that were government owned, and critical access hospitals (eTables 3-5).

eTable 1. AOR for All Variables in the Final Model to Examine the Association Between ICU Beds and Mechanical Ventilation

| Variable                                   | AOR       | 95% CI      |
|--------------------------------------------|-----------|-------------|
| Gender (reference male)                    | 0.77      | 0.75-0.79   |
| Diagnosis                                  |           |             |
| CHF                                        | 1.24      | 1.20-1.27   |
| Cardiac                                    | 0.98      |             |
| Cancer                                     | 0.97      | 0.97-1.02   |
| History of Hip fracture                    | 0.87      | 0.82-0.93   |
| History of pneumonia                       | 1.47      | 1.42-1.51   |
| Schizophrenia                              | 1.25      | 1.18-1.33   |
| Bipolar disease                            | 1.14      | 1.05-1.24   |
| Diabetes                                   | 1.15      | 1.12-1.18   |
| Aphasia                                    | 1.04      | 1.00-1.07   |
| Stroke                                     | 0.99      | 0.96-1.02   |
| Hemiplegia                                 | 0.94      | 0.90 -0.98  |
| Parkinson's disease                        | 0.96      | 0.93-1.00   |
| COPD/Emphysema                             | 1.55      | 1.50-1.59   |
| ESRD                                       | 1.10      | 1.06-1.15   |
| Traumatic Brain Injury                     | 1.17      | 1.00-1.37   |
| Paraplegia                                 | 1.07      | 0.86-1.33   |
| ADL = 4                                    | Reference |             |
| ADL = 5                                    | 1.12      | 1.02-1.23   |
| ADL = 6                                    | 1.14      | 1.05-.124   |
| ADL = 7                                    | 1.28      | 1.18-1.39   |
|                                            |           |             |
| CPS = 5                                    | Reference |             |
| CPS = 6                                    | 1.54      | 1.49-1.59   |
| Race                                       |           |             |
| White                                      | Reference |             |
| Black                                      | 1.24      | 1.20-1.28   |
| Hispanic                                   | 1.65      | 1.1         |
| Age                                        | 0.98      | 0.973--.977 |
| Time from MDS to Hospitalization (per day) | 0.99      | 0.998-0.999 |
| Transferred from NH                        | 1.14      | 1.11-1.18   |
| Prior Hospitalization                      | 1.29      | 1.26-1.32   |

|                                   |      |             |
|-----------------------------------|------|-------------|
| ICU Beds per 10 increase          | 1.06 | 1.05-1.07   |
| ICU Stepdown beds per 10 increase | 1.01 | 1.004-1.014 |
|                                   |      |             |

**eTable 2. Characterizations of Hospitals Included and Excluded in the Analyses**

| Characteristic             | Hospitalization Included<br>(n=634,182) | Hospitalization Excluded<br>(n=109,165) |
|----------------------------|-----------------------------------------|-----------------------------------------|
| Age (mean, SD, IQR)        | 84.2 (7.5, 79,90)                       | 84.0 (7.4, 79, 89) ( <i>P</i> <.01)     |
| Sex (% female)             | 30.9                                    | 30.5 ( <i>P</i> =.02)                   |
| Race (%)                   |                                         |                                         |
| White                      | 72.5                                    | 69.7 ( <i>P</i> <.01)                   |
| Black                      | 22.3                                    | 22.6                                    |
| Hispanic                   | 2.8                                     | 4.1                                     |
| Mechanical Ventilation (%) | 6.3                                     | 5.2 ( <i>P</i> <.01)                    |
| CPS score is 6             | 62.2                                    | 65.0 ( <i>P</i> <.01)                   |
| ADL dependency is 7        | 73.2                                    | 75.7 ( <i>P</i> ≤.01)                   |
|                            |                                         |                                         |
|                            |                                         |                                         |

eTable 3. 2004-2005 Hospitals Included and Excluded

| Hospital Characteristics                 | 2004-2005 Hospital Included<br>(N=2882) | 2004-2005 Hospital Excluded<br>(N= 1903) | 2004-2005 Hospital Excluded on no admissions, <i>P</i> value |
|------------------------------------------|-----------------------------------------|------------------------------------------|--------------------------------------------------------------|
| Tax Status (%)                           |                                         |                                          |                                                              |
| Government                               | 20.3                                    | 36.3                                     | <.001                                                        |
| Church owned                             | 13.3                                    | 7.4                                      |                                                              |
| Not-for-Profit                           | 52.4                                    | 40.9                                     |                                                              |
| For-Profit                               | 14.1                                    | 16.2                                     |                                                              |
| Number of Beds<br>(mean, sd, IQR)        | 108.1 (104,35,148)                      | 32.7 (37.8, 14, 34)                      | <.001                                                        |
| Total Admissions<br>(mean, sd, IQR)      | 9709.0 (9911, 2488, 13919)              | 3813.5 (5516, 611, 4659)                 | <.001                                                        |
| JACHO Accredited<br>(% yes)              | 77.1                                    | 48.4                                     | <.001                                                        |
| Medical School<br>Affiliation<br>(% yes) | 28.9                                    | 18.6                                     | <.001                                                        |
| Critical Access<br>Hospital<br>(% yes)   | 13.3                                    | 43.8                                     | <.001                                                        |
|                                          |                                         |                                          |                                                              |

eTable 4. 2000-2001 Hospitals Included and Excluded

| Hospital Characteristics                  | 2000-2001 Hospital Included<br>(N=3076) | 2000-2001 Hospital Excluded<br>(N= 1532) | P value |
|-------------------------------------------|-----------------------------------------|------------------------------------------|---------|
| Tax Status (%)                            |                                         |                                          |         |
| Government                                | 21.8                                    | 32.6                                     | <.001   |
| Church owned                              | 13.0                                    | 9.0                                      |         |
| Not-for-Profit                            | 51.8                                    | 43.4                                     |         |
| For-Profit                                | 13.4                                    | 15.1                                     |         |
| Number of Beds<br>(mean, sd, IQR)         | 102.4 (94,38,132)                       | 39.1 (74.2, 15, 36)                      | <.001   |
| Total Admissions<br>(mean, sd, IQR)       | 8332.0 (8639, 2174, 11557)              | 3710 (5727, 1192, 10685)                 | <.001   |
| JACHO Accredited<br>(% yes)               | 85.6                                    | 56.3                                     | <.001   |
| Medical School<br>Affiliation<br>(% yes)  | 20.7                                    | 11.3                                     | <.001   |
| Critical Access<br>Hospital **<br>(% yes) |                                         |                                          |         |

\*\* Data not available in 2000.

eTable 5. 2012-2013 Hospitals Included and Excluded

| Hospital Characteristics                  | 2012-2013 Hospital Included<br>(N=2447) | 2001-2002 Hospital Excluded<br>(N= 1466) | P value |
|-------------------------------------------|-----------------------------------------|------------------------------------------|---------|
| Tax Status (%)                            |                                         |                                          |         |
| Government                                | 17.3                                    | 26.5                                     | <.001   |
| Church owned                              | 9.7                                     | 12.7                                     |         |
| Not-for-Profit                            | 55.0                                    | 44.4                                     |         |
| For-Profit                                | 15.1                                    | 19.4                                     |         |
| Number of Beds<br>(mean, sd, IQR)         | 128.7 (120, 42,177)                     | 36.3 (42.7, 17, 35)                      | <.001   |
| Total Admissions<br>(mean, sd, IQR)       | 10,821.8 (11,177, 2802, 15381)          | 3637.8 (5151, 600, 4483)                 | <.001   |
| JACHO Accredited<br>(% yes)               | 78.8                                    | 52.3                                     | <.001   |
| Medical School<br>Affiliation<br>(% yes)  | 34.3                                    | 16.6                                     | <.001   |
| Critical Access<br>Hospital **<br>(% yes) | 10.6                                    | 44.3                                     | <.001   |
